# Supplementary material
Source: PubMed Central journal article supplement (PMC3479478)
Supplement: 1207144109_pnas.201207144SI.pdf [file 1207144109_pnas.201207144SI.pdf]

# Supporting Information

Tymula et al. 10.1073/pnas.1207144109

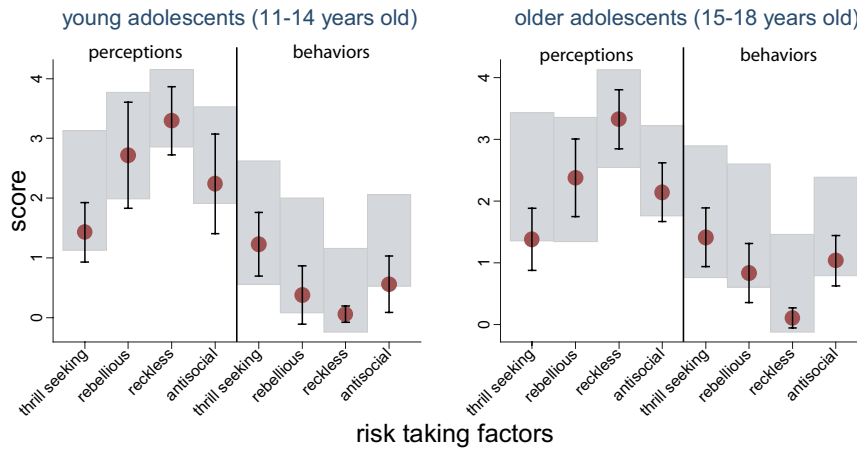

**Fig. S1.** Adolescent Risk-Taking Questionnaire scores. The red dots are the average scores of adolescents that participated in this study ( $\pm 1$  SD). The gray bars indicate the scores obtained by Gullone et al. (1) in a representative sample of adolescents (mean  $\pm 1$  SD).

1. Gullone E, Moore S, Moss S, Boyd C (2000) The Adolescent Risk-Taking Questionnaire: Development and psychometric evaluation. *J Adolesc Res* 15:231–250.

**Table S1. Analysis of risk and ambiguity attitudes, including behavioral inhibition scores (BIS) and behavioral approach scores (BAS) scores as covariates**

|                     | $\alpha$ | $\beta$   | $\mu$    |
|---------------------|----------|-----------|----------|
| Adolescent          | -0.165*  | -0.417*** | -0.113   |
|                     | (-2.13)  | (-4.42)   | (-1.63)  |
| Site                | 0.158    | -0.079    | 0.082    |
|                     | (1.88)   | (-0.55)   | (0.83)   |
| BAS drive           | -0.008   | -0.033    | 0.008    |
|                     | (-0.47)  | (-1.07)   | (0.51)   |
| BAS fun             | -0.002   | 0.009     | -0.008   |
|                     | (-0.10)  | (0.20)    | (-0.26)  |
| BAS reward          | -0.065   | 0.138*    | 0.025    |
|                     | (-1.49)  | (2.03)    | (0.59)   |
| BIS                 | 0.027    | -0.027    | -0.094** |
|                     | (0.97)   | (-0.71)   | (-2.97)  |
| Constant            | 0.879*** | 0.542     | 1.110*** |
|                     | (3.31)   | (0.93)    | (4.30)   |
| No. of observations |          | 10,391    |          |

Z statistics in parentheses. Robust SEs clustered on subject. \* $P < 0.05$ ; \*\* $P < 0.01$ ; \*\*\* $P < 0.001$ .

**Table S2. Analysis of risk and ambiguity attitudes, including impulsivity scores (B11) as covariates**

|                          | $\alpha$             | $\beta$            | $\mu$               |
|--------------------------|----------------------|--------------------|---------------------|
| Adolescent               | -0.317***<br>(-3.58) | -0.349*<br>(-2.15) | 0.061<br>(0.67)     |
| Site                     | 0.118<br>(1.19)      | -0.107<br>(-0.54)  | 0.063<br>(0.69)     |
| First-order B11 factors  |                      |                    |                     |
| Attention                | 0.029<br>(0.85)      | -0.083<br>(-1.07)  | -0.055<br>(-1.60)   |
| Motor                    | -0.016<br>(-0.36)    | 0.039<br>(0.70)    | -0.073*<br>(-2.01)  |
| Self-control             | 0.039<br>(0.97)      | 0.092<br>(0.82)    | 0.026<br>(0.46)     |
| Cognitive complexity     | -0.051<br>(-1.70)    | 0.054<br>(1.06)    | 0.022<br>(0.90)     |
| Perseverance             | -0.007<br>(-0.14)    | -0.046<br>(-0.35)  | 0.094<br>(1.43)     |
| Cognitive instability    | 0.011<br>(0.37)      | -0.019<br>(-0.35)  | -0.031<br>(-1.05)   |
| Second-order B11 factors |                      |                    |                     |
| Attentional              | 0.036<br>(1.28)      | -0.010<br>(-0.17)  | 0.038<br>(1.12)     |
| Motor                    | -0.124*<br>(-2.22)   | 0.013<br>(0.13)    | 0.013<br>(0.20)     |
| Nonplanning              | 0.019<br>(1.16)      | -0.070<br>(-1.56)  | -0.068**<br>(-2.79) |
| Constant                 | 1.042**<br>(3.06)    | 0.875<br>(1.26)    | 1.085**<br>(3.04)   |
| No. of observations      |                      | 10,391             |                     |

Z statistics in parentheses. Robust SEs clustered on subject. \* $P < 0.05$ ; \*\* $P < 0.01$ ; \*\*\* $P < 0.001$ .

**Table S3. Analysis of risk and ambiguity attitudes, including socioeconomic factors as covariates**

|                     | $\alpha$          | $\beta$             | $\mu$               |
|---------------------|-------------------|---------------------|---------------------|
| Adolescent          | -0.153<br>(-1.46) | -0.406**<br>(-3.10) | -0.088<br>(-0.93)   |
| Site                | 0.136<br>(1.55)   | 0.010<br>(0.07)     | 0.216*<br>(2.25)    |
| Male                | 0.061<br>(0.76)   | 0.093<br>(0.69)     | 0.072<br>(1.03)     |
| Household wealth    | 0.000<br>(0.11)   | 0.000<br>(-0.24)    | 0.000<br>(1.66)     |
| No. of siblings     | -0.021<br>(-0.45) | -0.002<br>(-0.02)   | 0.039<br>(0.83)     |
| IQ score            | 0.002<br>(0.65)   | 0.004<br>(0.69)     | -0.011**<br>(-3.26) |
| Constant            | 0.456<br>(1.42)   | 0.211<br>(0.28)     | 1.711***<br>(3.89)  |
| No. of observations |                   | 10,231              |                     |

Wealth is self-reported household wealth; for adolescents, this measure was obtained from a questionnaire completed by parents or legal guardians. Z statistics in parentheses. Robust SEs clustered on subject. \* $P < 0.05$ ; \*\* $P < 0.01$ ; \*\*\* $P < 0.001$ .

**Table S4. Model estimation using age as a continuous variable and age/sex interaction**

|                     | Age and constant regressors only |                   | Age/sex interaction |                   |
|---------------------|----------------------------------|-------------------|---------------------|-------------------|
|                     | $\alpha$                         | $\beta$           | $\alpha$            | $\beta$           |
| Age                 | 0.005<br>(1.08)                  | 0.017**<br>(2.72) | 0.066*<br>(2.30)    | 0.080<br>(1.10)   |
| Site                |                                  |                   | 0.115<br>(1.37)     | -0.300<br>(-1.70) |
| Male                |                                  |                   | 0.899<br>(0.97)     | -1.029<br>(-0.54) |
| Male* age           |                                  |                   | -0.052<br>(-0.81)   | 0.073<br>(0.57)   |
| B11 motor           |                                  |                   | -0.034<br>(-0.80)   |                   |
| BAS reward          |                                  |                   |                     | 0.259<br>(1.93)   |
| Constant            | 0.524***<br>(5.32)               | 0.114<br>(0.73)   | -0.318<br>(-0.80)   | -1.900<br>(-1.46) |
| No. of observations | 10,391                           |                   | 5,270               |                   |

We replicate all of the major findings of the paper using a continuous age variable instead of an age dummy variable. The table presents results of two separate estimation procedures. The right columns present a richer model, controlling for site effects and relevant psychological scores. We did not find any significant age/sex interactions, meaning that risk and ambiguity attitudes of female and male subjects in our sample change at the same pace as they age. Z statistics in parentheses. Robust SEs clustered on subject. \* $P < 0.05$ ; \*\* $P < 0.01$ ; \*\*\* $P < 0.001$ .

**Table S5. Analysis of risk and ambiguity attitudes of adolescents, including Adolescent Risk-Taking Questionnaire (ARQ) scores as covariates**

|                     | Behavioral ARQ    |                    | Perceptual ARQ    |                    |
|---------------------|-------------------|--------------------|-------------------|--------------------|
|                     | $\alpha$          | $\beta$            | $\alpha$          | $\beta$            |
| Age                 | 0.073*<br>(1.98)  | 0.098<br>(1.02)    | 0.054<br>(1.74)   | 0.033<br>(0.38)    |
| Site                | 0.240<br>(1.70)   | -0.302<br>(-0.71)  | 0.152<br>(1.57)   | -0.434*<br>(-2.49) |
| ARQ thrill-seeking  | 0.067<br>(0.84)   | 0.020<br>(0.13)    | -0.146<br>(-1.57) | 0.169<br>(0.87)    |
| ARQ rebellious      | -0.028<br>(-0.29) | 0.163<br>(1.07)    | 0.066<br>(0.70)   | -0.381*<br>(-2.53) |
| ARQ reckless        | 0.396<br>(1.43)   | -1.004*<br>(-2.11) | 0.018<br>(0.17)   | 0.121<br>(0.56)    |
| ARQ antisocial      | -0.128<br>(-0.87) | 0.425<br>(1.18)    | -0.031<br>(-0.28) | 0.014<br>(0.07)    |
| B11 motor           | -0.043<br>(-1.54) |                    | -0.019<br>(-0.51) |                    |
| BAS reward          |                   | 0.388**<br>(3.13)  |                   | 0.315**<br>(2.70)  |
| Constant            | -0.354<br>(-0.70) | -3.247*<br>(-2.28) | -0.124<br>(-0.24) | -1.110<br>(-0.63)  |
| No. of observations | 3,357             |                    | 5,270             |                    |

Site is a dummy variable that indicates whether the subject participated in the study in New York City or in New Haven, CT (equal to 1 for participants in New York City). Z statistics in parentheses. Robust SEs clustered on subject. \* $P < 0.05$ ; \*\* $P < 0.01$ ; \*\*\* $P < 0.001$ .
